# Supplementary material for: A symbiotic-like biologically-driven regenerating fabric
Source: PubMed Central journal article supplement (PMC5561142; doi:10.1038/s41598-017-09105-4), 2017-08-17
Supplement: 41598_2017_9105_MOESM1_ESM.pdf [file 41598_2017_9105_MOESM1_ESM.pdf]

# **A symbiotic-like biologically-driven regenerating fabric**

**Neta Raab<sup>1,2</sup>, Joe Davis<sup>3</sup>, Rachel Spokoini-Stern<sup>1,2</sup>, Moran Kopel<sup>1</sup>, Ehud Banin<sup>2</sup>, Ido Bachelet<sup>1,4</sup>**

1. Bionics cluster, Augmanity, Rehovot, Israel.
2. The Mina and Everard Goodman Faculty of Life Sciences and the Institute of Nanotechnology & Advanced Materials, Bar-Ilan University, Ramat-Gan, Israel.
3. Department of Genetics and Wyss Institute for Biologically-inspired Engineering, Harvard Medical School, Boston MA, USA
4. Address for correspondence: 8 Hamada St., Rehovot 7670308, Israel. Tel +972-546216664. E-mail: [dogbach@gmail.com](mailto:dogbach@gmail.com)

## Supplementary notes

Supplementary note 1: Fabric and hybrid analysis  
Supplementary note 2: Transcriptome table  
Supplementary note 3: Bioinformatics/QC of RNAseq  
Supplementary note 4: Pathway enrichment  
Supplementary note 5: Promoter sequences  
Supplementary note 6: Silk protein sequences  
Supplementary note 7: Protein expression in insect and bacterial systems  
Supplementary note 8: Regenerating fabric system  
Supplementary note 9: on hypothetical crossbiotic systems  
Supplementary note 10: Primer table  
Supplementary note 11: Plasmid maps  
Supplementary note 12: Culture media and protocols

## List of supplementary figures and tables

Fig S1: fabric architectures  
Table S1: fabric-biofilm characterisation  
Fig S2: QC of RNA seq reads  
Fig S3: HC counts  
Fig S4: Principal component analysis  
Fig S5: differential gene expression  
Table S2: pre-processing of reads  
Table S3: mapping summary  
Table S4: transcriptome table  
Fig S6: DAVID analysis  
Table S5: KEGG ortholog list for iPATH  
Table S6: Tear-responsive elements  
Table S7: crossbiotic systems  
Fig S7: Assembly of silk fibers from transformed *E. coli*  
Fig S8: Silk fiber structures of single segments and a combination product  
Fig S9: S2 cell culture and transformation  
Fig S10: Protein purification and analysis  
Fig S11: Silk protein expressed in S2  
Movie S12: Regenerating fabric system, SEM imaging  
Fig S13: cost range of usable materials  
Table S8: primers used in this study  
Table S9A,B,C: culture medium ingredients  
Table S10: 10X MC ingredients  
Fig S14: plasmid map, pBE-S-SPsegII  
Fig S15: plasmid map, pMT-BiP-V5-HisA-SPsegII  
Fig S16: plasmid map, pBS3Clux-pst\_sigA  
Fig S17: plasmid map, pINsilklI

**Supplementary note 1: Fabric and hybrid analysis**

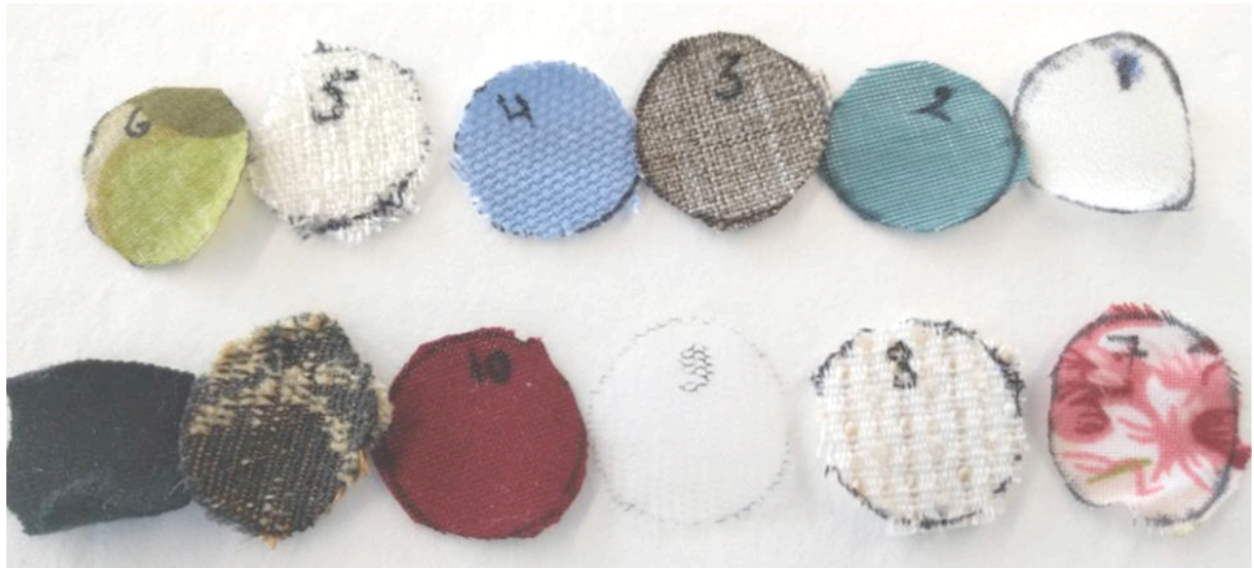

**Figure S1.** Partial selection of fabrics represented in this study.

- 1 - 70% chiffon 30% polyester
- 2 - 100% nylon
- 3 - 90% polyester 10% cotton
- 4 - 55% acrylic 45% nylon
- 5 - 55% cotton 45% polyester
- 6 - 100% cotton
- 7 - 90% nylon 10% cotton
- 8 - canvas
- 9 - 100% polyester
- 10 - 55% linen and 45% cotton
- 11 - 100% cashmere wool
- 12 - 85% spandex 15% polyester

**Table S1. Fabric-biofilm characterization**

|                                | Fabric 6 (**) | Fabric 3 (*)         | Fabric 9 (***) |
|--------------------------------|---------------|----------------------|----------------|
| Fabric material                | Cotton        | Cotton and polyester | Polyester      |
| Thread size ( $\mu\text{m}$ )  | 15 $\pm$ 12   | 15 $\pm$ 10          | 18 $\pm$ 12    |
| Density (white:black px ratio) | 1.6           | 1.1                  | 0.4            |
| Biofilm roughness              | +             | +                    | +++            |

\*density count using Fiji => binary black background; adjust threshold; selection (white); measure; selection inverse (black); measure.

## Supplementary note 2: Bioinformatics/QC of RNAseq

### Mean per base sequence quality

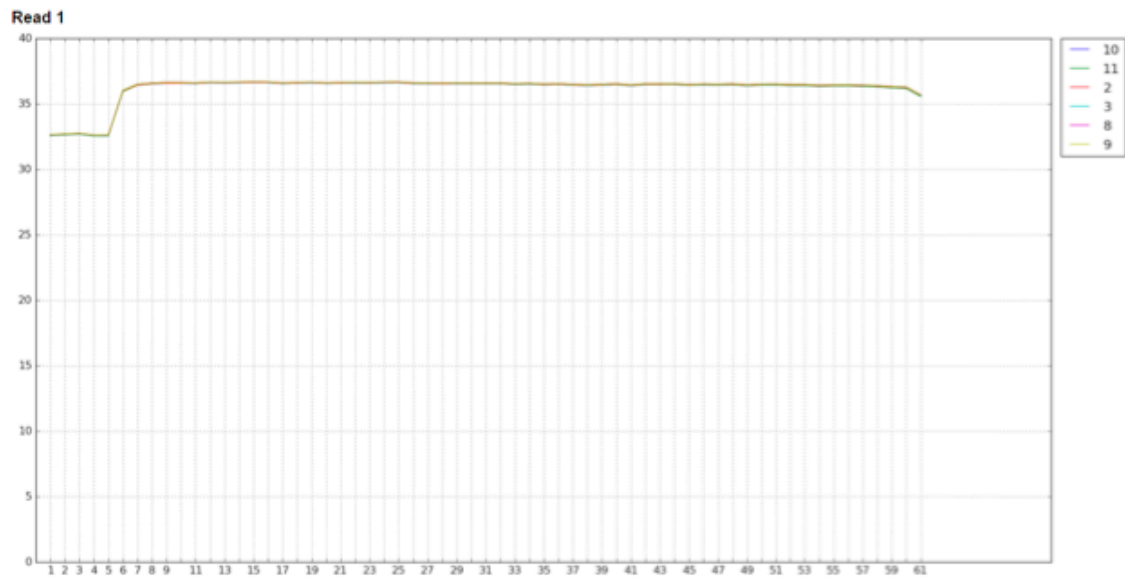

**Figure S2.** Quality control of RNA seq reads, performed using FastQC. Graph shows counts of reads length for all samples. Base quality is good. [ ]

**Table S2. Pre-processing of reads**

| Sample | Condition | Reads      | % Trimmed | % Poly A/T | # Reads after pre-processing |
|--------|-----------|------------|-----------|------------|------------------------------|
| 2      | WT        | 45,835,100 | 0.20%     | 0.08%      | 45,737,166                   |
| 3      | WT        | 54,865,647 | 0.20%     | 0.08%      | 54,804,930                   |
| 8      | WT        | 50,848,481 | 0.20%     | 0.01%      | 50,794,691                   |
| 9      | T         | 46,945,025 | 0.10%     | 0.01%      | 46,149,689                   |
| 10     | T         | 48,977,290 | 0.10%     | 0.01%      | 48,842,321                   |
| 11     | T         | 51,358,845 | 0.10%     | 0.05%      | 51,240,417                   |

Adapters were removed using cutadapt. Reads that had a length less than 40 bases after the adapter trimming were discarded, as well as reads with more than 50% polyA/T.

**Table S3. Mapping summary**

| Sample | Condition | % Uniquely mapped reads |
|--------|-----------|-------------------------|
| 2      | WT        | 98.40%                  |
| 3      | WT        | 98.40%                  |
| 8      | WT        | 98.50%                  |
| 9      | T         | 98.50%                  |

|    |   |        |
|----|---|--------|
| 10 | T | 98.20% |
| 11 | T | 98.30% |

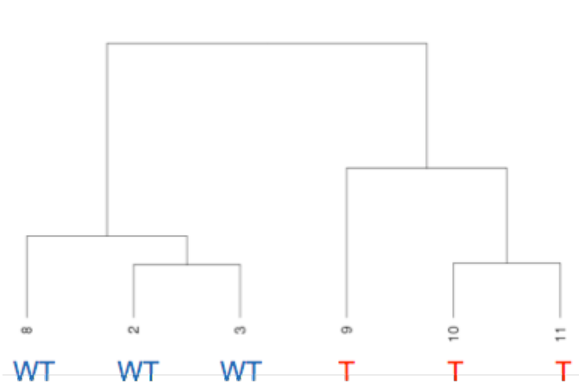

**Figure S3.** HC counts. Counting was done using HTSeq and gene annotation was based on Ensembles *B. Subtilis* gtf: ([ftp://ftp.ensemblgenomes.org/pub/bacteria/release-30/gtf/bacteria\\_0\\_collection/bacillus\\_subtilis\\_subsp\\_subtilis\\_str\\_168/Bacillus\\_subtilis\\_subsp\\_subtilis\\_str\\_168.GCA\\_000009045.1](ftp://ftp.ensemblgenomes.org/pub/bacteria/release-30/gtf/bacteria_0_collection/bacillus_subtilis_subsp_subtilis_str_168/Bacillus_subtilis_subsp_subtilis_str_168.GCA_000009045.1)). HC was done on 100 most varying genes (T – samples that underwent tearing, WT – control samples).

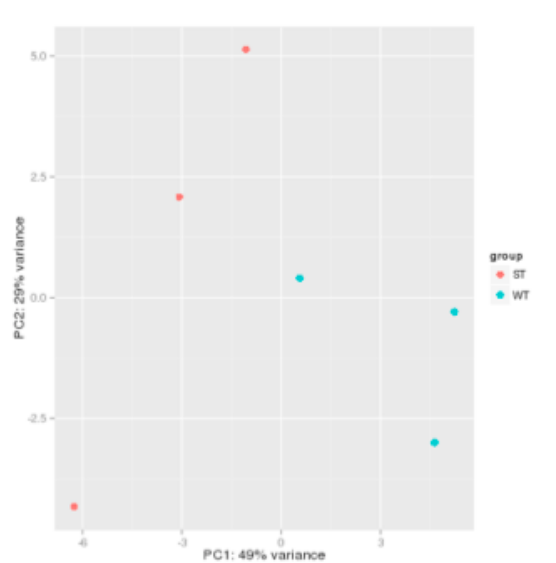

**Figure S4.** The statistical method, principal component analysis, was used to evaluate the variance between all samples. Clusters of triplicates - control group and experiment, were found.

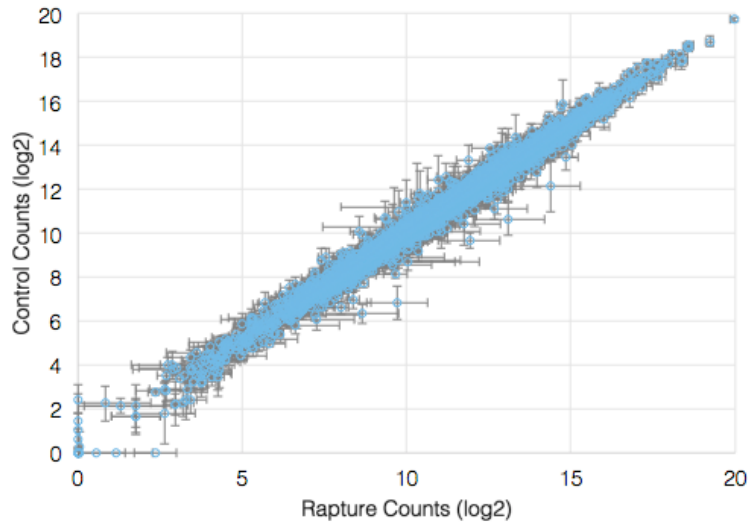

**Figure S5.** Differential gene expression of torn vs. control biofilms based on RNA seq.

### Supplementary note 3: Transcriptome table

The following table lists raw data values of gene expression for torn vs. control biofilm. Numbers under “tear” and “control” columns are sample IDs.

**Table S4.** Transcriptome table

| Gene_ID  | Gene_Name | Tear      |           |           | Control   |           |           | baseMean             | log2FoldChange       | pvalue   | padj                     |
|----------|-----------|-----------|-----------|-----------|-----------|-----------|-----------|----------------------|----------------------|----------|--------------------------|
|          |           | 9         | 10        | 11        | 2         | 3         | 8         |                      |                      |          |                          |
| BSU12000 | manR      | 1356      | 1502      | 1274      | 3166      | 3751      | 3466      | 2378.212523<br>26146 | 1.2277563176<br>5743 | 2.47E-32 | 1.06E-28                 |
| BSU35690 | ggaA      | 2459<br>8 | 2890<br>4 | 247<br>23 | 5788<br>4 | 6152<br>4 | 4951<br>8 | 40680.85360<br>88913 | 1.0159148198<br>9121 | 6.63E-14 | 9.48E-11                 |
| BSU40610 | trnY-Asp  | 360       | 493       | 321       | 976       | 1119      | 920       | 686.0728516<br>59643 | 1.2659102611<br>9556 | 7.62E-13 | 5.45E-10                 |
| BSU03050 | ldh       | 965       | 643       | 772       | 287       | 351       | 255       | 556.3260220<br>69365 | 1.5264998044<br>0284 | 1.78E-12 | 1.06E-09                 |
| BSU35698 | yvzI      | 1162      | 1609      | 1114      | 3288      | 3853      | 2786      | 2261.980434<br>65887 | 1.2588220107<br>3143 | 1.97E-12 | 1.06E-09                 |
| BSU18860 | yozH      | 248       | 274       | 228       | 572       | 571       | 506       | 395.2753478<br>30953 | 1.0419079640<br>0333 | 4.48E-11 | 1.92E-08                 |
| BSU40600 | trnY-Asp  | 538       | 850       | 581       | 1667      | 1842      | 1415      | 1129.843011<br>86903 | 1.2323781030<br>6344 | 1.37E-10 | 5.35E-08                 |
| BSU38320 | cidA      | 216       | 295       | 238       | 118       | 96        | 92        | 178.2816820<br>81823 | 1.3772341915<br>2902 | 1.94E-10 | 6.40E-08                 |
| BSU20450 | yorA      | 938       | 1046      | 946       | 2634      | 2566      | 1798      | 1636.154463<br>09779 | 1.1648205978<br>4445 | 8.63E-10 | 2.32E-07                 |
| BSU20430 | yorC      | 150       | 222       | 178       | 586       | 586       | 383       | 345.6287994<br>18969 | 1.4121752692<br>4639 | 1.57E-09 | 3.97E-07                 |
| BSU38330 | ywbG      | 295       | 387       | 282       | 159       | 116       | 114       | 228.9231001<br>13098 | 1.3898225665<br>0076 | 2.73E-09 | 5.86E-07                 |
| BSU21460 | bdbA      | 285       | 388       | 447       | 1371      | 1644      | 667       | 784.8572471<br>2148  | 1.6209902365<br>0937 | 1.71E-07 | 2.15E-05                 |
| BSU21360 | yomH      | 158       | 185       | 154       | 504       | 616       | 287       | 311.6335433<br>97729 | 1.4023985090<br>7806 | 2.60E-07 | 3.01E-05                 |
| BSU27630 | yrvD      | 2356      | 2570      | 2418      | 6458      | 6378      | 3907      | 3972.982796<br>23634 | 1.0975044045<br>0693 | 3.64E-07 | 3.78E-05                 |
| BSU40160 | yydH      | 1841      | 2771      | 2876      | 5330      | 6473      | 4406      | 3887.902252<br>55798 | 1.0177586458<br>1137 | 4.48E-07 | 4.37E-05                 |
| BSU21450 | sunS      | 1808      | 2323      | 2692      | 7489      | 8798      | 3761      | 4400.717210<br>27082 | 1.4589737299<br>5835 | 4.93E-07 | 4.70E-05                 |
| BSU21470 | sunT      | 2622      | 4657      | 3898      | 13275     | 14755     | 6247      | 7441.138782<br>26097 | 1.5308537655<br>8769 | 7.81E-07 | 7.13E-05                 |
| BSU40170 | yydG      | 3503      | 8171      | 6751      | 14049     | 15952     | 16129     | 10555.13908<br>95733 | 1.2369576789<br>4223 | 1.05E-06 | 9.36E-05                 |
| BSU38720 | nnrA      | 1162      | 1274      | 1319      | 391       | 636       | 839       | 943.8666591<br>68837 | 1.1237087926<br>9716 | 1.17E-06 | 0.00010233871<br>8699781 |
| BSU33950 | cggR      | 2353<br>2 | 4062<br>2 | 241<br>27 | 1303<br>8 | 1587<br>3 | 7404      | 20929.80665<br>92847 | 1.3706417630<br>9467 | 1.88E-06 | 0.00015520712<br>1718197 |
| BSU21400 | yomD      | 91        | 103       | 88        | 217       | 265       | 162       | 151.9703248<br>60881 | 1.0905213607<br>7168 | 2.17E-06 | 0.00017554420<br>1782684 |
| BSU27786 | ena       | 668       | 1742      | 459       | 157       | 154       | 65        | 547.0189326<br>88374 | 2.9969425383<br>4036 | 7.81E-06 | 0.00050747129<br>4511421 |
| BSU17670 | cotU      | 63        | 99        | 92        | 202       | 232       | 151       | 137.6689754<br>71662 | 1.1093169621<br>192  | 8.66E-06 | 0.00052367857<br>6583695 |

|                 |          |           |           |           |           |            |           |                      |                      |                          |                          |
|-----------------|----------|-----------|-----------|-----------|-----------|------------|-----------|----------------------|----------------------|--------------------------|--------------------------|
| BSU21440        | bdbB     | 502       | 605       | 829       | 2119      | 2521       | 983       | 1238.368478<br>16358 | 1.4401210846<br>8353 | 8.59E-06                 | 0.00052367857<br>6583695 |
| BSU05050        | lrpA     | 200       | 387       | 227       | 579       | 627        | 554       | 422.2681826<br>11791 | 1.0264375933<br>365  | 1.00E-05                 | 0.00057999939<br>9754406 |
| BSU35610        | tuaA     | 2729      | 8112      | 230<br>8  | 771       | 1154       | 655       | 2636.445545<br>05266 | 2.4337519451<br>99   | 2.45E-05                 | 0.00117890745<br>607515  |
| BSU21420        | bhlA     | 45        | 48        | 56        | 138       | 146        | 86        | 85.39857078<br>11908 | 1.2156779550<br>38   | 2.90E-05                 | 0.00127064851<br>114843  |
| BSU11210        | argB     | 4288      | 2810      | 310<br>3  | 1701      | 1481       | 2274      | 2651.697251<br>9093  | 1.0069790653<br>0462 | 3.22E-05                 | 0.00138117969<br>70992   |
| BSU34860        | hisl     | 7093      | 8416      | 101<br>42 | 2995      | 3717       | 6604      | 6546.926683<br>12427 | 1.0527276359<br>4804 | 0.00010427694<br>9572377 | 0.00315107317<br>334557  |
| BSU35609        | tuaA     | 255       | 984       | 232       | 85        | 116        | 60        | 289.6636607<br>38165 | 2.5688070417<br>8099 | 0.00020087288<br>3522464 | 0.00504061721<br>166603  |
| BSU34870        | hisF     | 5456      | 6773      | 791<br>3  | 2010      | 2734       | 5322      | 5072.630269<br>57704 | 1.1099490930<br>4599 | 0.00030276137<br>1983525 | 0.00691036727<br>2241    |
| BSU04370        | ydaS     | 1405<br>5 | 1616<br>1 | 166<br>23 | 4543      | 6823       | 1284<br>1 | 11920.95587<br>55739 | 1.0651363728<br>6362 | 0.00043687197<br>18433   | 0.00884253599<br>613018  |
| BSU24980        | pstC     | 6083      | 2105<br>1 | 481<br>0  | 1732      | 2703       | 954       | 6248.548699<br>30587 | 2.6487164240<br>4024 | 0.00054587126<br>3310844 | 0.01000997261<br>0542    |
| BSU15520        | pyrAB    | 2412<br>1 | 2569<br>4 | 313<br>72 | 8278<br>0 | 1100<br>35 | 2688<br>3 | 49246.06765<br>88965 | 1.3319771451<br>9089 | 0.00055011385<br>1987715 | 0.01004484484<br>62948   |
| BSU15530        | pyrK     | 7103      | 6881      | 855<br>4  | 1841<br>9 | 2647<br>0  | 7771      | 12314.07403<br>28762 | 1.1140125167<br>9196 | 0.00121931126<br>246825  | 0.01744021542<br>41709   |
| BSU35540        | tuaH     | 2290      | 1967      | 156<br>7  | 6780      | 1136<br>4  | 2522      | 4295.091826<br>51434 | 1.7078392750<br>8248 | 0.00373671921<br>94734   | 0.03728442326<br>03233   |
| BSU35550        | tuaG     | 1103      | 1009      | 878       | 3134      | 5489       | 1282      | 2090.089777<br>6578  | 1.6077271724<br>1556 | 0.00387713094<br>996174  | 0.03781083842<br>33769   |
| BSU24990        | pstS     | 1481<br>0 | 4432<br>0 | 133<br>72 | 5851      | 9206       | 1886      | 14971.02567<br>61274 | 2.1828451029<br>1882 | 0.00405491120<br>446237  | 0.03910027860<br>30293   |
| BSU32490        | pucC     | 352       | 112       | 82        | 70        | 51         | 94        | 130.7120226<br>52005 | 1.4604718768<br>3969 | 0.00420224987<br>105138  | 0.03998193835<br>18437   |
| BSU06460        | purS     | 649       | 713       | 855       | 1819      | 2298       | 686       | 1153.867449<br>73916 | 1.0139095316<br>9512 | 0.00432579532<br>795716  | 0.04097569040<br>23491   |
| BSU35570        | tuaE     | 1608      | 1278      | 113<br>5  | 4433      | 6974       | 1708      | 2787.301583<br>59318 | 1.5875378795<br>0331 | 0.00453547333<br>014195  | 0.04176333918<br>37749   |
| BSU35560        | tuaF     | 1062      | 831       | 679       | 2405      | 3944       | 1029      | 1620.027058<br>88484 | 1.3999196750<br>3743 | 0.01044751370<br>43846   | 0.07395746163<br>68844   |
| BSU35600        | tuaB     | 4393      | 1463<br>4 | 371<br>4  | 2349      | 3215       | 1593      | 4985.825260<br>10814 | 1.7449300812<br>9797 | 0.01091269487<br>32811   | 0.07589363646<br>87993   |
| BSU32500        | pucB     | 243       | 89        | 40        | 53        | 47         | 72        | 92.98623299<br>01723 | 1.2319322843<br>543  | 0.02419828773<br>26258   | 0.12575145951<br>4056    |
| BSU15510        | pyrAA    | 7996      | 9390      | 123<br>74 | 2896<br>7 | 3695<br>4  | 9245      | 17203.45904<br>96022 | 1.2359900857<br>075  | 0.03185070781<br>48149   | 0.14953105824<br>22      |
| BSU36510        | amtB     | 5608      | 458       | 420       | 540       | 380        | 394       | 1369.723752<br>39794 | 2.4314077993<br>6936 | 0.04092604474<br>07655   | 0.17631748642<br>0117    |
| BSU24950        | pstBB    | 1339      | 2295      | 120<br>3  | 4314      | 7719       | 1321      | 2946.844240<br>42925 | 1.3588560248<br>527  | 0.05048872090<br>285     | 0.19785123414<br>989     |
| BSU32480        | pucD     | 1809      | 544       | 413       | 416       | 363        | 411       | 678.6119172<br>85925 | 1.3357636867<br>9161 | 0.05215441937<br>34676   | 0.20179856946<br>0369    |
| BSU_tRNA<br>_38 | rrnW-23S | 0         | 0         | 0         | 1         | 3          | 3         | 1.099580488<br>57465 | 5.8605430187<br>2996 | 0.05253131830<br>71809   | 0.20280008909<br>4565    |
| BSU26619        | yrzO     | 6         | 10        | 6         | 18        | 24         | 10        | 12.09738297<br>05475 | 1.1426251749<br>6319 | 0.05376743393<br>87466   | 0.20581271992<br>0751    |



|                    |          |      |      |          |      |      |      |                       |                      |                        |                       |
|--------------------|----------|------|------|----------|------|------|------|-----------------------|----------------------|------------------------|-----------------------|
| BSU32510           | pucA     | 411  | 91   | 81       | 85   | 71   | 83   | 141.5597075<br>06567  | 1.4093526092<br>8221 | 0.07461196200<br>64852 | 0.25249205754<br>7183 |
| BSU24970           | pstA     | 2210 | 8395 | 193<br>3 | 1619 | 2535 | 678  | 2883.587116<br>27681  | 1.4551761471<br>7547 | 0.07752033057<br>95056 | 0.25816974346<br>8259 |
| BSU03320           | nasB     | 3601 | 453  | 351      | 535  | 405  | 416  | 1002.769933<br>62616  | 1.8264167655<br>9524 | 0.07984952193<br>27123 | 0.26195282768<br>5985 |
| BSU32470           | pucE     | 504  | 147  | 106      | 123  | 104  | 133  | 191.3543596<br>0399   | 1.1918007436<br>6323 | 0.09811995803<br>7479  | 0.29686045066<br>4813 |
| EBG000009<br>77943 | trnY-Lys | 3    | 2    | 0        | 5    | 4    | 9    | 3.772401996<br>94658  | 1.7472884626<br>5933 | 0.11065345186<br>0417  | 0.31717699527<br>9257 |
| BSU03310           | nasC     | 3269 | 339  | 340      | 588  | 353  | 372  | 917.0610206<br>11246  | 1.7060605886<br>9186 | 0.11558683583<br>2912  | 0.32502169892<br>4655 |
| BSU03330           | nasA     | 5138 | 1089 | 121<br>2 | 1395 | 951  | 1141 | 1880.607894<br>3908   | 1.2071686482<br>7355 | 0.11893487278<br>0176  | 0.33122497471<br>16   |
| BSU02690           | ansZ     | 2448 | 543  | 364      | 519  | 503  | 480  | 834.6839509<br>84023  | 1.2878621402<br>3371 | 0.12576171182<br>4881  | 0.34279582444<br>9185 |
| BSU40780           | trnY-Asp | 0    | 0    | 0        | 2    | 0    | 1    | 0.510531935<br>971536 | 4.7295052972<br>7493 | 0.19117577234<br>406   | 0.43727891211<br>5331 |
| EBG000009<br>77897 | trnY-Lys | 1    | 3    | 1        | 1    | 0    | 0    | 1.022406650<br>82351  | 2.3613283819<br>3736 | 0.26533223688<br>5224  | 0.53578382516<br>4468 |
| BSU20320           | yorN     | 5    | 1    | 1        | 3    | 10   | 4    | 3.890535777<br>50953  | 1.1289834014<br>4525 | 0.28987507171<br>2205  | 0.56506453878<br>4928 |
| BSU_tRNA<br>_43    | rrnW-23S | 1    | 3    | 0        | 1    | 6    | 4    | 2.378881168<br>06455  | 1.3385826746<br>3301 | 0.32459297190<br>4308  | 0.59752399933<br>1353 |
| EBG000009<br>77986 | rpmH     | 1    | 1    | 1        | 1    | 0    | 0    | 0.693474877<br>338661 | 1.6358713058<br>057  | 0.47854669683<br>6613  | 0.71912652105<br>6928 |
| BSU_tRNA<br>_29    | rrnW-23S | 1    | 0    | 0        | 0    | 0    | 0    | 0.179623275<br>641969 | 3.3250343826<br>6173 | 0.48649164843<br>1615  | 0.72303152118<br>9743 |

## Supplementary note 4: Pathway enrichment

### BLAST-KOALA analysis

The aim of this analysis was to get all protein sequences of the genes that were differentially expressed and submit them to BLAST KOALA. This search would result in a list of KOs that can be used for iPATH visualisation.

1. The table was split into 2 tables: upregulated (Condition VS control) and downregulated genes.
2. To retrieve the sequences of the genes in each list, the tables were fed to the "Fish\_GFF\_info\_for\_fasta\_v1.py" script. The script takes both the table and a GFF file (downloaded from ensemble at: [ftp://ftp.ensemblgenomes.org/pub/bacteria/release-30/gff3/bacteria\\_0\\_collection/bacillus\\_subtilis\\_subsp\\_subtilis\\_str\\_168/Bacillus\\_subtilis\\_subsp\\_subtilis\\_str\\_168.GCA\\_000009045.1.30.gff3.gz](ftp://ftp.ensemblgenomes.org/pub/bacteria/release-30/gff3/bacteria_0_collection/bacillus_subtilis_subsp_subtilis_str_168/Bacillus_subtilis_subsp_subtilis_str_168.GCA_000009045.1.30.gff3.gz)) and compares them. Each ID in the table (column 1 - "gene\_ID") appears in the gff file in the attributes section as "locus\_tag". It is written into an output file called "\$INPUT\_FILE\_BASENAME\_fetch\_fasta.tab".
3. The "fetch\_fasta" file is then fed into the script "connection2ncbi\_v2.py" script (which takes it as an argument using a "-i" switch). The script will connect to NCBI Entrez and "fish" the fasta sequence of each gene based on the GI number (of the genome), the start and end positions of the feature, and its orientation (provided in the output of step 2). Please note that NCBI requires an email address of the user: use the "-e" switch to enter your email or write it into the script to use in default cases. Outputs were named using the "-o" switch. the default is named: "./myOutput.fa".
4. The resulting output is a nucleotide fasta. feed it to "translate.py" (requires biopython) to translate it to amino acids sequence. The output will be named automatically (\$INPUT\_FILE\_BASENAME\_protSeq.fa).
5. The amino acids multi-fasta file is then submitted to BLAST KOALA (<http://www.kegg.jp/blastkoala/>). We used the "family\_eukaryotes + genus\_prokaryotes" database because if a sequence will not be found in the prokaryotes DB for any reason it might be found in the EUKs DB.
6. Out of the BLAST-KOALA results, the gene\_name to KO list was downloaded (Down/UpGenes\_ko\_list\_geneName.txt) and the KO numbers were extracted (files are named "UpGenes\_ko\_list.txt" or "DownGenes\_ko\_list.txt").

### % mapping to KEGG

DownGenes: 82 KO were retrieved out of 291 genes (27.8%)

UpGenes: 142 KOs out of 206 genes (68.9%)

The lists were assembled to one tab delimited file with the hexadecimal code for the desired color to appear in iPATH for each table in this case, red (#ff0000) for downregulated genes and green (#00ff00) for the upregulated ones. The desired width of the edges is added in the last column of the table (uniform width, in this case W14)

Tables are used for iPATH visualization: <http://pathways.embl.de/iPath2.cgi>.

Note that the relative weights of each gene (expression levels) are not regarded. this is possible but requires another step for the analysis (the normalized weights are given in the table). it can be visualized as the width of the edge.

### DAVID analysis

This analysis is examining the enrichment of functions in a list of upregulated and downregulated genes extracted from differential expression analysis performed by the bioinformatics unit of Weizmann Institute using DESeq2.

1. Gene names as they appear in the gff file were used to match a UniProt accessions (that can be identified by DAVID, in contrast to the names appearing in the files). This was done by going to <http://www.uniprot.org/uploadlists/> and uploading the list of genes. Procedure is: select from "gene name" to "UniProtKB" and click "go". Than list of identifiers is downloaded (file was named "Gene\_name\_to\_uniprot.tab").
2. Several IDs could not be found in the UniProt database (2 in the upregulated genes and 8 in the down regulated genes) - a list of "orphans" gene IDs, including gene name, product, and weather it was included in the DAVID analysis or not is provided (B.subtilis\_orphan\_IDs-no\_uniProt\_Accession.xlsx). Finally, only one of the orphans was included in the DAVID analysis from each list (from the list of the upregulated and of the downregulated genes).

NOTE: Out of 204 upregulated genes submitted to DAVID, 201 found a hit. out of 284 downregulated genes 270 found a hit.

3. UniProt accessions were uploaded to DAVID and the CO\_BP\_FAT, CO\_BP\_ALL, KEGG\_pathways, COG\_ontology, and interPro\_protein\_domains tables were downloaded for visualization. Only GO\_BR\_ALL\_UpGenes.txt and GO\_BR\_ALL\_downGenes.txt were used
4. The optional parameters of the tables were first modified: all statistical values (FDR, Benferoni etc.) were included in the tables and the counts threshold was reduced from 2 to 1. The tables were saved as tab delimited text files and the headers were modified to match Shengwei's bbplot modified R script (provided - bbplot\_visualization.R). The graphic is provided in the PDF file "GO\_BP\_FAT\_enrichment.pdf". The red circles represent downregulated and the green upregulated GO terms. the size of the circle is proportional to the number of genes assigned to the respective GO in the list and the opacity reflects the level of certainty for enrichment (the more solid the color, the more certain is the enrichment)

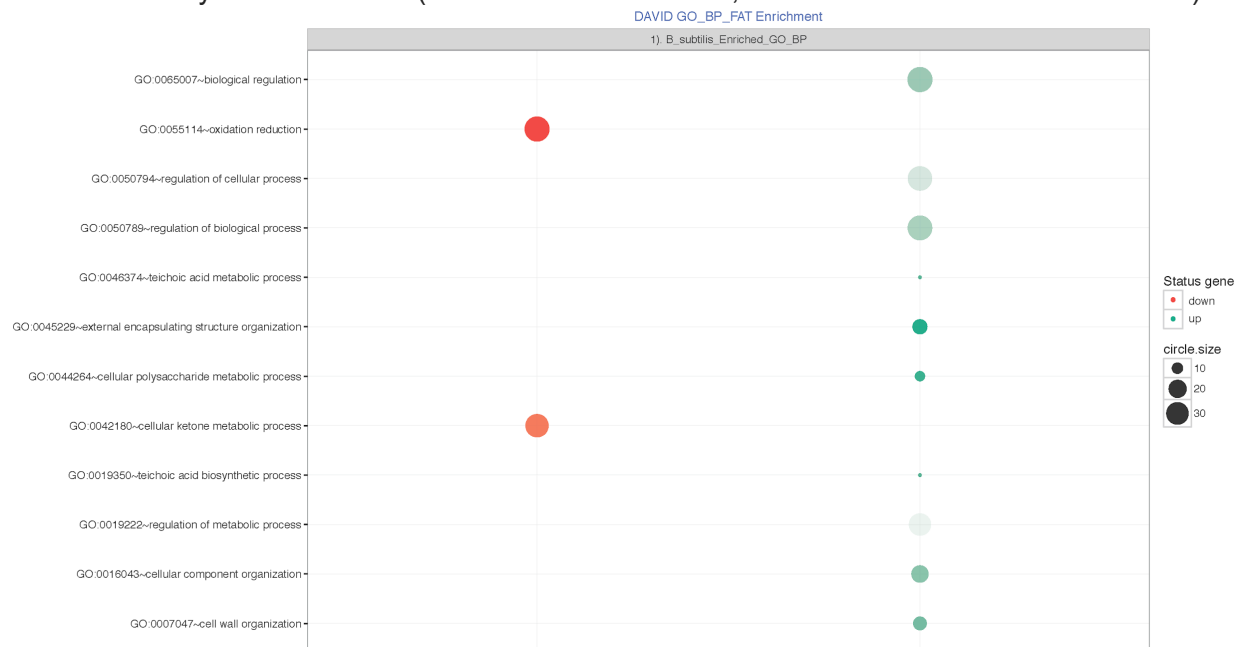

**Figure S6.** DAVID analysis. Circle size is proportional to number of genes assigned to the respective function, the opacity is related to the probability of enrichment of this function (the more solid the color, the more probable this function is enriched in the provided list). Red is enriched in the list of down-regulated genes, Green in the list of up-regulated. This figure is based on GO terms. It can be generated for KEGG, COG, interPro ect. GO yielded the highest amount of functions.

**Table S5. KEGG ortholog list for iPATH**

|                |     |
|----------------|-----|
| K01952 #00ff00 | W14 |
| K02549 #00ff00 | W14 |
| K06131 #00ff00 | W14 |
| K02337 #00ff00 | W14 |
| K00558 #00ff00 | W14 |
| K03584 #00ff00 | W14 |
| K06147 #00ff00 | W14 |
| K16705 #00ff00 | W14 |
| K00805 #00ff00 | W14 |
| K01493 #00ff00 | W14 |
| K01486 #00ff00 | W14 |
| K01447 #00ff00 | W14 |
| K07300 #00ff00 | W14 |
| K05595 #00ff00 | W14 |
| K09793 #00ff00 | W14 |
| K00963 #00ff00 | W14 |
| K03719 #00ff00 | W14 |
| K03885 #00ff00 | W14 |
| K16916 #00ff00 | W14 |
| K09888 #00ff00 | W14 |
| K16509 #00ff00 | W14 |
| K02004 #00ff00 | W14 |
| K11535 #00ff00 | W14 |
| K07727 #00ff00 | W14 |
| K03733 #00ff00 | W14 |
| K03284 #00ff00 | W14 |
| K00928 #00ff00 | W14 |
| K07025 #00ff00 | W14 |
| K03310 #00ff00 | W14 |
| K03719 #00ff00 | W14 |
| K00980 #00ff00 | W14 |
| K06380 #00ff00 | W14 |
| K07778 #00ff00 | W14 |
| K05845 #00ff00 | W14 |
| K05946 #00ff00 | W14 |
| K03090 #00ff00 | W14 |
| K06147 #00ff00 | W14 |
| K02253 #00ff00 | W14 |
| K01092 #00ff00 | W14 |
| K00963 #00ff00 | W14 |
| K03588 #00ff00 | W14 |
| K15973 #00ff00 | W14 |
| K17763 #00ff00 | W14 |
| K13256 #00ff00 | W14 |
| K01952 #00ff00 | W14 |
| K19302 #00ff00 | W14 |
| K07088 #00ff00 | W14 |
| K04757 #00ff00 | W14 |
| K01926 #00ff00 | W14 |
| K00012 #00ff00 | W14 |
| K08724 #00ff00 | W14 |
| K01732 #00ff00 | W14 |
| K19225 #00ff00 | W14 |
| K00805 #00ff00 | W14 |
| K06609 #00ff00 | W14 |
| K07217 #00ff00 | W14 |

|                |     |
|----------------|-----|
| K03091 #00ff00 | W14 |
| K02851 #00ff00 | W14 |
| K07680 #00ff00 | W14 |
| K19224 #00ff00 | W14 |
| K04749 #00ff00 | W14 |
| K01952 #00ff00 | W14 |
| K01990 #00ff00 | W14 |
| K17828 #00ff00 | W14 |
| K18672 #00ff00 | W14 |
| K16044 #00ff00 | W14 |
| K03611 #00ff00 | W14 |
| K00525 #00ff00 | W14 |
| K07052 #00ff00 | W14 |
| K07571 #00ff00 | W14 |
| K11616 #00ff00 | W14 |
| K02823 #00ff00 | W14 |
| K03892 #00ff00 | W14 |
| K02909 #00ff00 | W14 |
| K03708 #00ff00 | W14 |
| K03317 #00ff00 | W14 |
| K19411 #00ff00 | W14 |
| K03088 #00ff00 | W14 |
| K05770 #00ff00 | W14 |
| K07038 #00ff00 | W14 |
| K04047 #00ff00 | W14 |
| K01955 #00ff00 | W14 |
| K00010 #0000ff | W14 |
| K00016 #0000ff | W14 |
| K00033 #0000ff | W14 |
| K00090 #0000ff | W14 |
| K00111 #0000ff | W14 |
| K00123 #0000ff | W14 |
| K00128 #0000ff | W14 |
| K00148 #0000ff | W14 |
| K00162 #0000ff | W14 |
| K00167 #0000ff | W14 |
| K00239 #0000ff | W14 |
| K00374 #0000ff | W14 |
| K00381 #0000ff | W14 |
| K00382 #0000ff | W14 |
| K00384 #0000ff | W14 |
| K00620 #0000ff | W14 |
| K00625 #0000ff | W14 |
| K00626 #0000ff | W14 |
| K00627 #0000ff | W14 |
| K00648 #0000ff | W14 |
| K00766 #0000ff | W14 |
| K00782 #0000ff | W14 |
| K00789 #0000ff | W14 |
| K00818 #0000ff | W14 |
| K00839 #0000ff | W14 |
| K00865 #0000ff | W14 |
| K00878 #0000ff | W14 |
| K00925 #0000ff | W14 |
| K00928 #0000ff | W14 |
| K00930 #0000ff | W14 |
| K00939 #0000ff | W14 |
| K01126 #0000ff | W14 |
| K01179 #0000ff | W14 |

|                |     |
|----------------|-----|
| K01265 #0000ff | W14 |
| K01421 #0000ff | W14 |
| K01428 #0000ff | W14 |
| K01429 #0000ff | W14 |
| K01439 #0000ff | W14 |
| K01476 #0000ff | W14 |
| K01480 #0000ff | W14 |
| K01624 #0000ff | W14 |
| K01661 #0000ff | W14 |
| K01708 #0000ff | W14 |
| K01744 #0000ff | W14 |
| K01814 #0000ff | W14 |
| K01872 #0000ff | W14 |
| K01876 #0000ff | W14 |
| K01878 #0000ff | W14 |
| K01889 #0000ff | W14 |
| K01890 #0000ff | W14 |
| K01992 #0000ff | W14 |
| K02015 #0000ff | W14 |
| K02016 #0000ff | W14 |
| K02037 #0000ff | W14 |
| K02040 #0000ff | W14 |
| K02440 #0000ff | W14 |
| K02445 #0000ff | W14 |
| K02446 #0000ff | W14 |
| K02499 #0000ff | W14 |
| K02500 #0000ff | W14 |
| K02501 #0000ff | W14 |
| K02518 #0000ff | W14 |
| K02551 #0000ff | W14 |
| K02809 #0000ff | W14 |
| K02810 #0000ff | W14 |
| K02863 #0000ff | W14 |
| K02876 #0000ff | W14 |
| K02879 #0000ff | W14 |
| K02948 #0000ff | W14 |
| K02952 #0000ff | W14 |
| K02963 #0000ff | W14 |
| K02986 #0000ff | W14 |
| K02990 #0000ff | W14 |
| K03040 #0000ff | W14 |
| K03076 #0000ff | W14 |
| K03086 #0000ff | W14 |
| K03111 #0000ff | W14 |
| K03169 #0000ff | W14 |
| K03215 #0000ff | W14 |
| K03457 #0000ff | W14 |
| K03521 #0000ff | W14 |
| K03535 #0000ff | W14 |
| K03546 #0000ff | W14 |
| K03638 #0000ff | W14 |
| K03657 #0000ff | W14 |
| K03753 #0000ff | W14 |
| K03885 #0000ff | W14 |
| K03977 #0000ff | W14 |
| K04023 #0000ff | W14 |
| K04091 #0000ff | W14 |
| K04751 #0000ff | W14 |
| K05311 #0000ff | W14 |

|                |     |
|----------------|-----|
| K05795 #0000ff | W14 |
| K05845 #0000ff | W14 |
| K05846 #0000ff | W14 |
| K06173 #0000ff | W14 |
| K06180 #0000ff | W14 |
| K06416 #0000ff | W14 |
| K06518 #0000ff | W14 |
| K06605 #0000ff | W14 |
| K06606 #0000ff | W14 |
| K06610 #0000ff | W14 |
| K06889 #0000ff | W14 |
| K06901 #0000ff | W14 |
| K06960 #0000ff | W14 |
| K06966 #0000ff | W14 |
| K07024 #0000ff | W14 |
| K07104 #0000ff | W14 |
| K07160 #0000ff | W14 |
| K07217 #0000ff | W14 |
| K07240 #0000ff | W14 |
| K07406 #0000ff | W14 |
| K07516 #0000ff | W14 |
| K08166 #0000ff | W14 |
| K08223 #0000ff | W14 |
| K08234 #0000ff | W14 |
| K08289 #0000ff | W14 |
| K08680 #0000ff | W14 |
| K09015 #0000ff | W14 |
| K10710 #0000ff | W14 |
| K11752 #0000ff | W14 |
| K11755 #0000ff | W14 |
| K11996 #0000ff | W14 |
| K12308 #0000ff | W14 |
| K13292 #0000ff | W14 |
| K13612 #0000ff | W14 |
| K13767 #0000ff | W14 |
| K13770 #0000ff | W14 |
| K14338 #0000ff | W14 |
| K14665 #0000ff | W14 |
| K15532 #0000ff | W14 |
| K17217 #0000ff | W14 |
| K17752 #0000ff | W14 |
| K17758 #0000ff | W14 |
| K17759 #0000ff | W14 |
| K17762 #0000ff | W14 |
| K18104 #0000ff | W14 |
| K18928 #0000ff | W14 |
| K18929 #0000ff | W14 |
| K19286 #0000ff | W14 |

## Supplementary note 5: Promoter sequences

**Table S6. Tear-responsive elements**

| Gene       | Element | Location          | Sequence                                                        | Reference |
|------------|---------|-------------------|-----------------------------------------------------------------|-----------|
| <i>skf</i> | sigA    | 213824...213891   | AATTTTTAGGATAATATACAAAAT <u>CCCC</u>                            | (1-3)     |
|            | spo0A   |                   | <u>CTTACTTCGACAATTGCAATCTGGTATT</u><br>ATCGTATCGCAT             |           |
| <i>tua</i> | sigA    | 3658932...3658981 | ATACCATTTACATCCAATTAACATCCGT<br>CTGCTAAACTGACTGGCATAGG          | (4)       |
|            | phoP    | 3658953...3658997 | <u>ATTACACTTCTTAACATACCATTTACA</u><br>TCCAATTAACATCCGTC         | (4-6)     |
| <i>pst</i> | sigA    | 2581674...2581724 | TTCGGTT <b>CAAA</b> CCCTTTTTACATAGAAC<br>CTTTACTCTATACGTGTAGGAC | (7)       |
|            | phoP    | 2581652...2581701 | CACTGATTTACAAAACCTTAACATTCGG<br>TTCAAACCCCTTTTTACATAGAAC        | (6-8)     |

\*Bold indicates promoter regions and underlined indicates positive elements regions

1. Chen, Guangnan, et al. "Spo0A-dependent activation of an extended- 10 region promoter in Bacillus subtilis." *Journal of bacteriology* 188.4 (2006): 1411-1418.
2. Molle, Virginie, et al. "The Spo0A regulon of Bacillus subtilis." *Molecular microbiology* 50.5 (2003): 1683-1701.
3. Fujita, Masaya, José Eduardo González-Pastor, and Richard Losick. "High-and low-threshold genes in the Spo0A regulon of Bacillus subtilis." *Journal of bacteriology* 187.4 (2005): 1357-1368.
4. Soldo, Blazenka, et al. "Teichuronic acid operon of Bacillus subtilis 168." *Molecular microbiology* 31.3 (1999): 795-805.
5. Liu, Wei, and F. Marion Hulett. "Comparison of PhoP binding to the tuaA promoter with PhoP binding to other Pho-regulon promoters establishes a Bacillus subtilis Pho core binding site." *Microbiology* 144.5 (1998): 1443-1450.
6. Allenby, Nicholas EE, et al. "Genome-wide transcriptional analysis of the phosphate starvation stimulon of Bacillus subtilis." *Journal of bacteriology* 187.23 (2005): 8063-8080.
7. Qi, Ying, Yasuo Kobayashi, and F. Marion Hulett. "The pst operon of Bacillus subtilis has a phosphate-regulated promoter and is involved in phosphate transport but not in regulation of the pho regulon." *Journal of bacteriology* 179.8 (1997): 2534-2539.
8. Liu, Wei, Ying Qi, and F. Marion Hulett. "Sites internal to the coding regions of phoA and pstS bind PhoP and are required for full promoter activity." *Molecular microbiology* 28.1 (1998): 119-130.



## Supplementary note 6: Silk protein sequences

### >SPsegI

VAGTDGSGGALARGAAGASSVASGDGAGAASGAKTVSVAGTDGSEGAVAGGVAGASSKASGNEGSGAASGAKTV  
SVAGTDGSGGALAGSAAGAISKASGDEGSGAASGAKTVSVAGTDGSEGAVAVGVAGASSKASGNEGSGAASGAK  
TVSVAGTDGSGGAHAGSAAGASSKASGDEGSGAASGAKTVSVAGTDGSGGALAGGAAGASSEASGDEGSGAASG  
AKAVSVAGTDGSGGALARGAAGASSVASGDGAGAASRANAGSIAGSGGPRGAVSGSSADVSSIIVGDGAALSGS  
SALARSASDGAGAAVGAAGAAQAGSVATGSGSDDSFATNAEAGTISYGDGSLSAAQSGSIAAAKGADVNVQSGSIS  
SAGNSVGAAGGSVETGQSHHCKRPVSTNSQPGGSGAEVNLPLGLRIKSDAVATVGLVLHHHHHH

### >SPsegII

EGSGAASGAKTVSVAGTDGSGGALAGSAAGAISKASGDEGSGAASGAKTVSVAGTDGSEGAVAGGVAGASSKAS  
GNEGSGAASGAKTVSVAGTDGSGGALAGGAAGASSEASGDEGSGAASGAKTVSVAETDGSGGALAGSAAGASSK  
ASGDEGSGAASGAKTVSVAGTDGSEGAVAGSAAGASSKASGNEGSGAASGAKTVSVAGTDGSGGAVAGGTAGAS  
SIASGDGGSGAASRANTVSVAGSDGSGGAIAGSSADSSGIAVGDGAALSGSSALARSASDGAGAAVGAAGAAQAGSV  
ATGSGSDDSFATNAEAGTISYGDGSLSAAQSGSIAPAKGADVNVQSGSISAGNSVGAAGGSVETGQSHHCKK  
PVSTNSQPGGSGAEVNLPLGLRIKSDAVATVGLVLHHHHHH

### >SPsegIII

MDFKIFLLVLLGAVVLSAVEGRPSGDDDVRIISSTKDVTSTGKRRSNSKNNVAQSSSQKDSIRVKDSNEVIKS  
ISENDPDGTRITTSKGTGVGSETLNENLVELNQNTVSDTNSVETSSDKSNSVTTYDADDRPLTVTDKRGQKDKV  
SATNAKEDSSEVSENSESETNWQSESDSVEKSVSHPVCGGAESPSSGGPQGGSPQGGGSQGGPSGQQPNGGIA  
VSSAEDAAAPQSTRTSTAEGESSFSAAADVNEGRKGNVALAGSTAYGRSVTNENSSSGSTQSFSGAAENVA  
SPDGGSTQRNAAIAGNIAEQVSSKEEVAEGKATLSGTIQESDENSQRSAAIAGSSAEANVATREQTSKGKTA  
AWTGNSQEKSTSPAEISETNIFSSGSYAEGSTLSREKLEQGKSTTWSEESESRKHHHHHHH

### >SPsegIV

MGSSALYLATIFLSLQVIDRSSAVAIISLPRRIYPRSRPAFSLAETKILDEICQSQCCKDSCYGCFSKLSGEQQS  
SESLKELKKCSSTYLKSPYSKCQKILDNGSFNGKCDTNSTVFCDYENCLLNIELDSLVAECKLEAKADGANIF  
KGTTCILTRIRCREFRSTGYYYSPNFNYALSFNKDLKLQLFPASYLPSDGRLTCGSQDPYQPPSQAARNRRT  
CDLCHHHHHH

### >SPsegV

KWKWLPKKRRLRSRKLHPQLGIPSNVFSGSPLDVLSQGPVAPGESLNAVPGSPTGFNQGSGLFPHSPLDGSSAQ  
GSPSAGQSPQESPISSSNLIPLLGSSPDDLGEYYEVEEDDGSWDYVSPDENTNSEDEHEDSSEDNSSLPGSS  
GSPPEGPSSGPNPSGNTETGSPKNENGNPQRSQSSVPSLAPSSPSGSTSSPIVGKPEGDTSSSGGSPGSAS  
PQVSSPGQSSQGTGPGSLSGTPQDGLSPGSPQDASSPEQSSQGAPGSSTDAPQDSSGSATKDDSPSSNGRTSKP  
SSATKRPGKGIKGLTKKKKGSPKAGKWTWLRKPGKRLRKKLKPVQLKPSGIPLSQGILKPTTDVSPNVIAQGNA  
AASAVAEGGKLSPNAPSPRSIAASNADANAAISSPDASLRADSAASSVASQVNNRSPLGALQGSRAEADAAAQA  
VITAPNQPRQEPVSPGSAQEKSRGNPFDLRNSLWQDENDQFNSLSSKLNQLSKNNKHLASNINNIENIFDKL  
YKFRSNTATNKHHHHHH

## Supplementary note 7: Protein expression in insect and bacterial systems

Alkaline lysis of transformed *E. coli*, and subsequent acidification of the lysate (using sodium acetate) and dehydration (using ethanol) resulted in rapid assembly of disordered mats of fibers of various diameters ranging from  $\sim 1$  to  $\sim 20 \mu\text{m}$  (Figures 9-10).

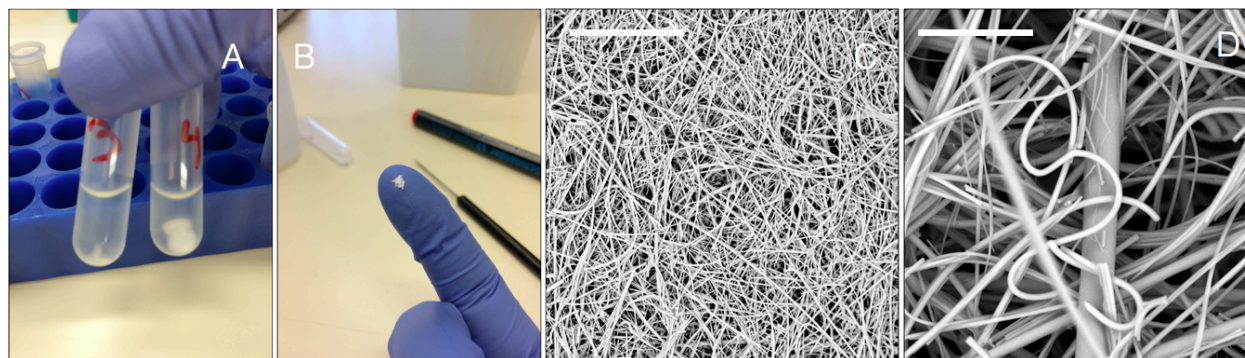

**Figure S7.** Assembly of silk fibers from transformed *E. coli*, following alkaline lysis, acidification, and dehydration (scale bars: C,  $1000 \mu\text{m}$ ; D,  $100 \mu\text{m}$ ).

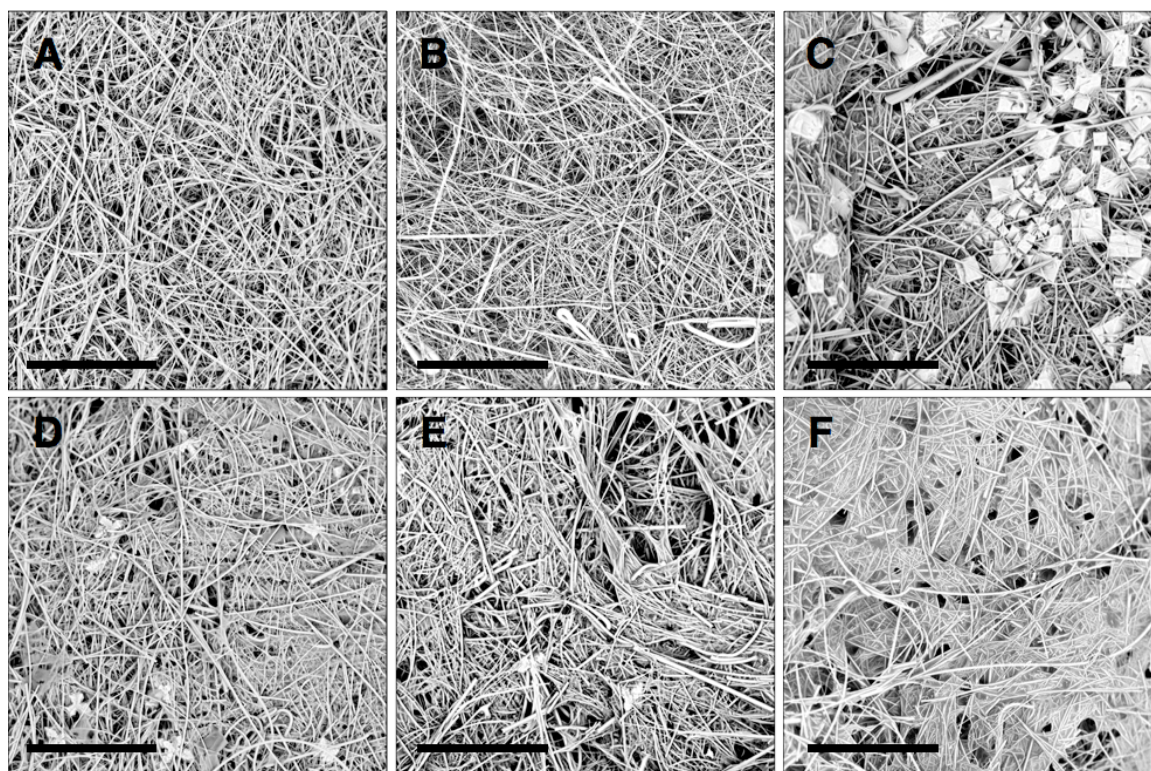

**Figure S8.** Silk fiber structures of single segments and a combination product. Panels A-E show structure of segments spsegI-V, respectively, while panel F shows the combination of spsegII+spsegV (all scale bars,  $1000 \mu\text{m}$ ; panel A is the same one used as panel C in Figure S7). Cubic objects appearing in some of the panels are salt crystals by EDS analysis.

In order to study the physical, mechanical, and chemical properties of these silk fibers, a higher-scale production was required. In addition, we decided to switch to an insect system to get fibers which are as similar to the source material as possible. Our chosen

expression system was the *Drosophila melanogaster* cell line Schneider's 2 (S2), which is a macrophage-like line derived from late stage primary cultures of embryonic cells.

S2 cells were cultured and evaluated daily for appearance and viability, to ensure <5% dead cells (**Figure S9**). An expression vector was constructed for segment spsegII. The expression vector included three modules: BiP, a *Drosophila* secretion signal; V5 epitope for protein detection; and 6His for purification. The cells were transformed using three methods - calcium phosphate, lipofectamine, and cellfectamine, with calcium phosphate resulting in successful expression of the protein (**Figure S9**).

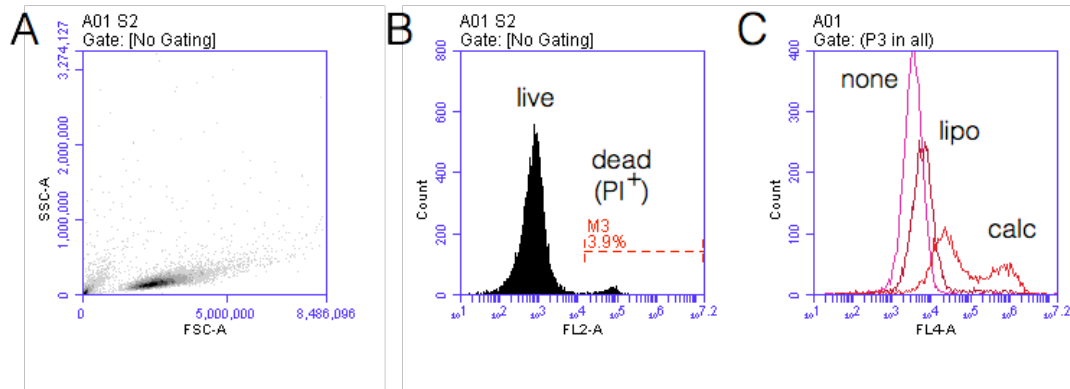

**Figure S9.** S2 cell culture and transformation. A, forward scatter/side scatter density plot of S2 cells. B, viability staining of S2 cells using propidium iodide (PI). C, result of transformation using either lipofectamine (lipo) or calcium phosphate (calc), compared with untreated cells (none). Cells were stained with anti-V5 antibody.

Successfully-transfected S2 cells were induced at 24, 48, and 72 hours post transfection for a period of 24 hours, after which culture supernatant and cell pellets were harvested for protein purification on a nickel column and analysis by western blot. A significant eluted fraction was detected and collected, and western blot (using weakly-reducing PAGE and anti-V5 antibody) analysis showed protein dimers in both supernatant and cell pellets from calcium phosphate transfected cells (**Figure S10**).

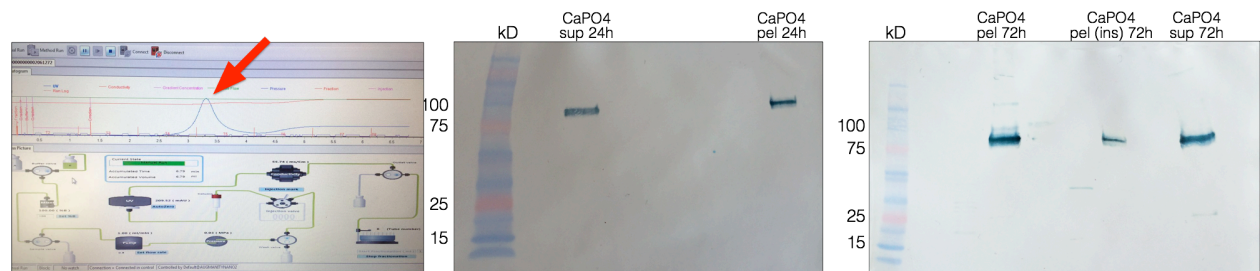

**Figure S10.** Protein purification and analysis. Left panel, FPLC spectrogram with red arrow pointing at silk protein elution fractions. Middle and right, western blots showing presence of silk protein in cell supernatant and pellets after 24 h and 72 h post transfection with calcium phosphate.

To produce assembled silk, purified proteins were dialyzed, concentrated, and acidified to pH ~6.0 to ~5.5. Within 1-2 min the silk protein self-assembled into fibers of ~5mm long. Fibers were analyzed for their diameter and composition using the SEM (**Figure S11**).



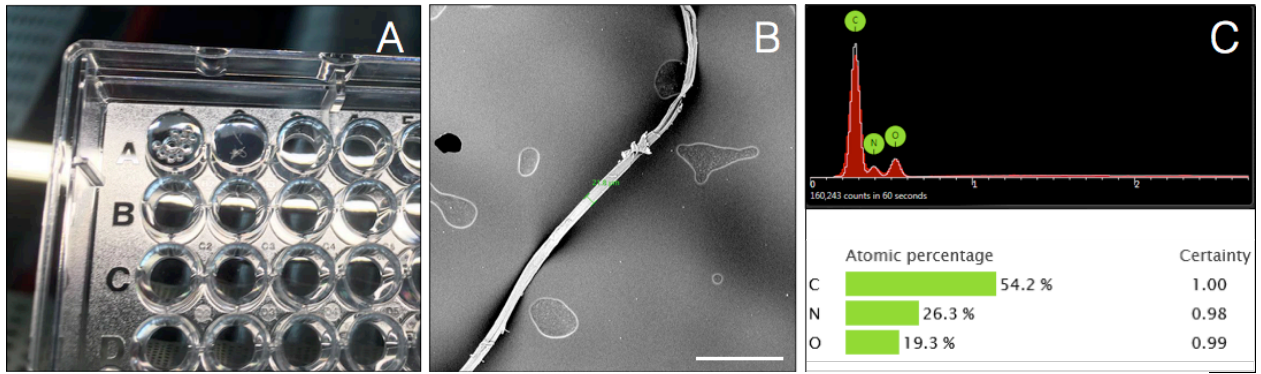

**Figure S11.** Silk protein expressed in S2. A, self-assembled fibers formed in well A2. B, SEM of a single fiber (scale bar: 100  $\mu\text{m}$ ). C, Elemental analysis of the fiber in the EDS module.

**Movie S12.** A Z-stack visualization of formed fiber in the fabric-biofilm hybrid.

## Supplementary note 8: hypothetical crossbiotic systems

Synthetic biological products potentially address three challenges:

1. **Smartness:** biological behaviors (response, self-organization, reproduction etc.) into mechanical systems, to achieve a system that is sustainable and resilient on one hand, and flexible on the other.
2. **Precision:** biological organizations mostly occur in nature under simple and neutral conditions, compared with those in a modern studio, manufacturing facility or laboratory. Synthetic biology offers high precision ranging from the sub-nanometer scale to kilometers, without the need for sophisticated, expensive setups.
3. **Cost:** while modern machines, materials etc. often display a high level of performance (for example, a laptop), their smartness and precision are accomplished by highly complex processes, rendering them relatively costly (**Figure X**). In contrast, synthetic biology could reduce the cost by several orders of magnitude, e.g. biofabricated computers would cost \$0.5/kg instead of \$500.

Biological organisms produce a remarkable array of materials with properties often far exceeding those of their synthetic counterparts including unique optical, electronic, and physicochemical properties. It is important to note, that although novel materials with information processing capabilities may be generated through physical and chemical means as well, they might be inferior in terms of sustainability and environmental compatibility than those achieved using biological, albeit synthetically assembled, parts and processes.

**Table S7.** Speculative crossbiotic systems constructable by synthetic biology and their applications

| Input><br>Output               | Light               | Chemical gradient<br>[O <sub>2</sub> , water, nutrients, pH, QS, AB] | Mechanical force                                   | Temperature                                                           | Magnetic fields | Gravity |
|--------------------------------|---------------------|----------------------------------------------------------------------|----------------------------------------------------|-----------------------------------------------------------------------|-----------------|---------|
| <b>Fabrics</b>                 | Adaptive camouflage |                                                                      | Self-repairing clothing and equipment              | Weather-adapting clothing                                             |                 |         |
| <b>Adhesive s/<br/>Cements</b> |                     | Water: Self-repair in sub-marine structures                          | Self-repair and integrity monitoring in structures |                                                                       |                 |         |
| <b>Foams</b>                   |                     | QS: Biofouling-proof surfaces<br>Water: self-insulating machines     | Crack filling structures<br>Water resistance       | Self-insulating machines<br>Weather-adapting insulation in structures |                 |         |

|                      |                                     |                                              |                                                           |                          |                                   |                                               |
|----------------------|-------------------------------------|----------------------------------------------|-----------------------------------------------------------|--------------------------|-----------------------------------|-----------------------------------------------|
| <b>Hard minerals</b> | On-demand electronic components     | Calcium/Silicates: Self-repairing structures | Calcium/Silicates: Self-repairing structures and machines |                          |                                   | Auto-correcting architecture (the Pisa Tower) |
| <b>Waxes</b>         |                                     | pH: Corrosion/humidity-proof surfaces        | Crack filling structures<br>Water resistance              | Self-insulating surfaces |                                   |                                               |
| <b>Particles</b>     | Photoactive composites and surfaces |                                              |                                                           |                          | On-demand magnetic memory devices |                                               |

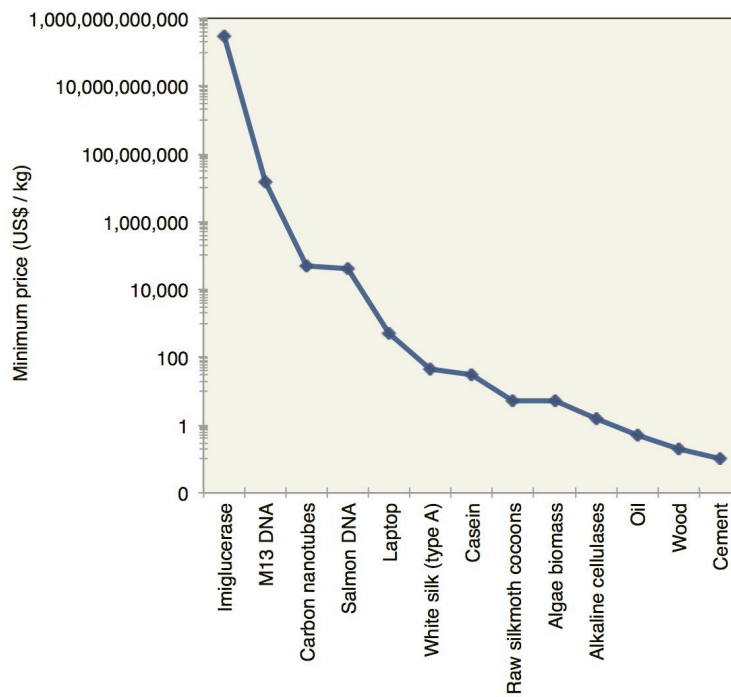

**Figure S13.** The cost range of a variety of usable materials across 12 orders of magnitude.  
**Supplementary note 9: Primers**

**Supplementary note 9: Primer table**

**Table S8. Primers used in this study**

| <b>Primer name</b>                                  | <b>Sequence</b>                              |
|-----------------------------------------------------|----------------------------------------------|
| Oligonucleotides for promoters *                    |                                              |
| <i>pst</i> _PhoP_F                                  | GAG AGT <b>GAA TTC</b> <u>CAC TGA TT</u>     |
| <i>pst</i> _PhoP_R                                  | AAA AAA <b>CTG CAG</b> <u>GTT CTA TG</u>     |
| <i>pst</i> _SigA_F                                  | GAG AGT <b>GAA TTC</b> <u>TTC GGT TC</u>     |
| <i>pst</i> _SigA_R                                  | AAA AAA <b>CTG CAG</b> <u>GTC CTA C</u>      |
| <i>skf</i> _Spo0A_F                                 | GAG AGT <b>GAA TTC</b> <u>AAT TTT TAG G</u>  |
| <i>skf</i> _Spo0A_R                                 | AAA AAA <b>CTG CAG</b> <u>ATG CGA TAC</u>    |
| <i>tua</i> _PhoP_F                                  | GAG AGT <b>GAA TTC</b> <u>ATT CAC AC</u>     |
| <i>tua</i> _PhoP_R                                  | AAA AAA <b>CTG CAG</b> <u>GAC GGA TG</u>     |
| <i>tua</i> _SigA_F                                  | GAG AGT <b>GAA TTC</b> <u>ATA CCA TTT AC</u> |
| <i>tua</i> _SigA_R                                  | AAA AAA <b>CTG CAG</b> <u>CCT ATG CC</u>     |
| Oligonucleotides for confirmation of plasmid curing |                                              |
| <i>sacA</i> FWD                                     | CCC GAA TGG CGT GAT TTA TTG                  |
| <i>sacA</i> REV                                     | CAG CCT GCC CTT TCA AAT TC                   |

\* Introduced restriction sites in the overhang shown in bold, annealing part is underlined.

Supplementary note 10: Plasmid maps

Created with SnapGene®

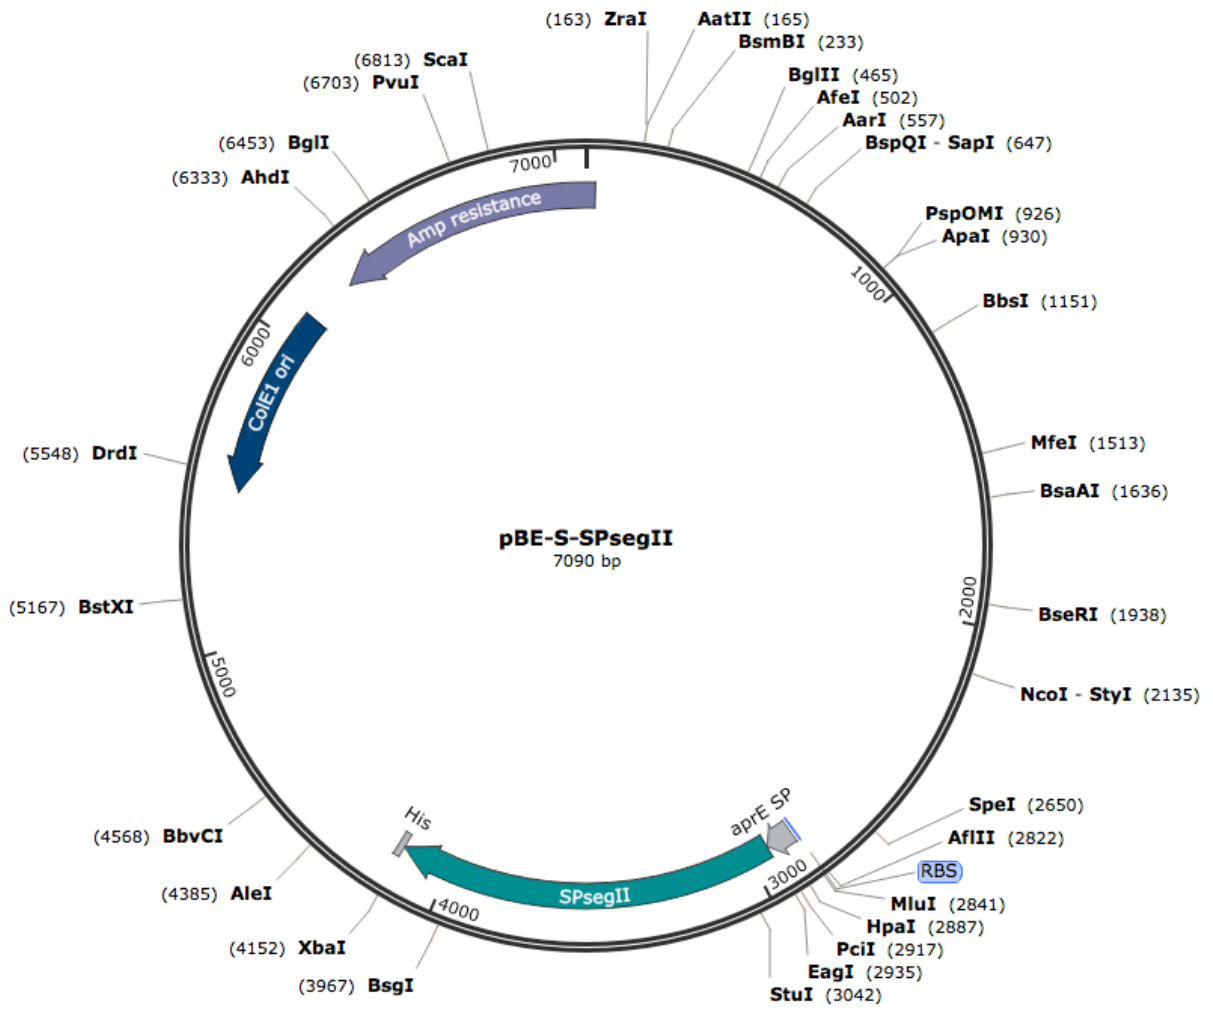

Figure S14. Plasmid map: pBE-S-SPsegII



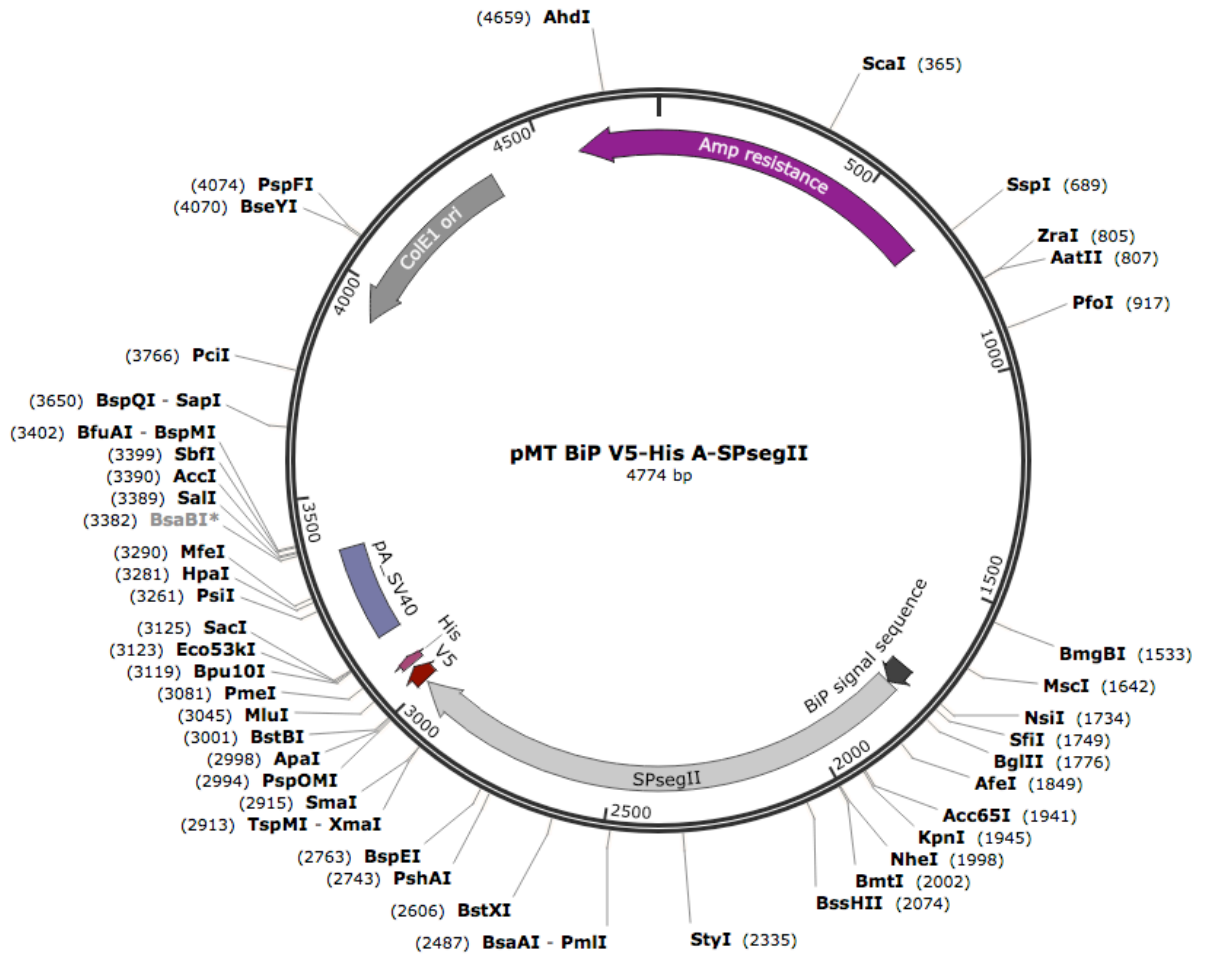

**Figure S15.** Plasmid map: pMT BiP V5-His A-SPsegII

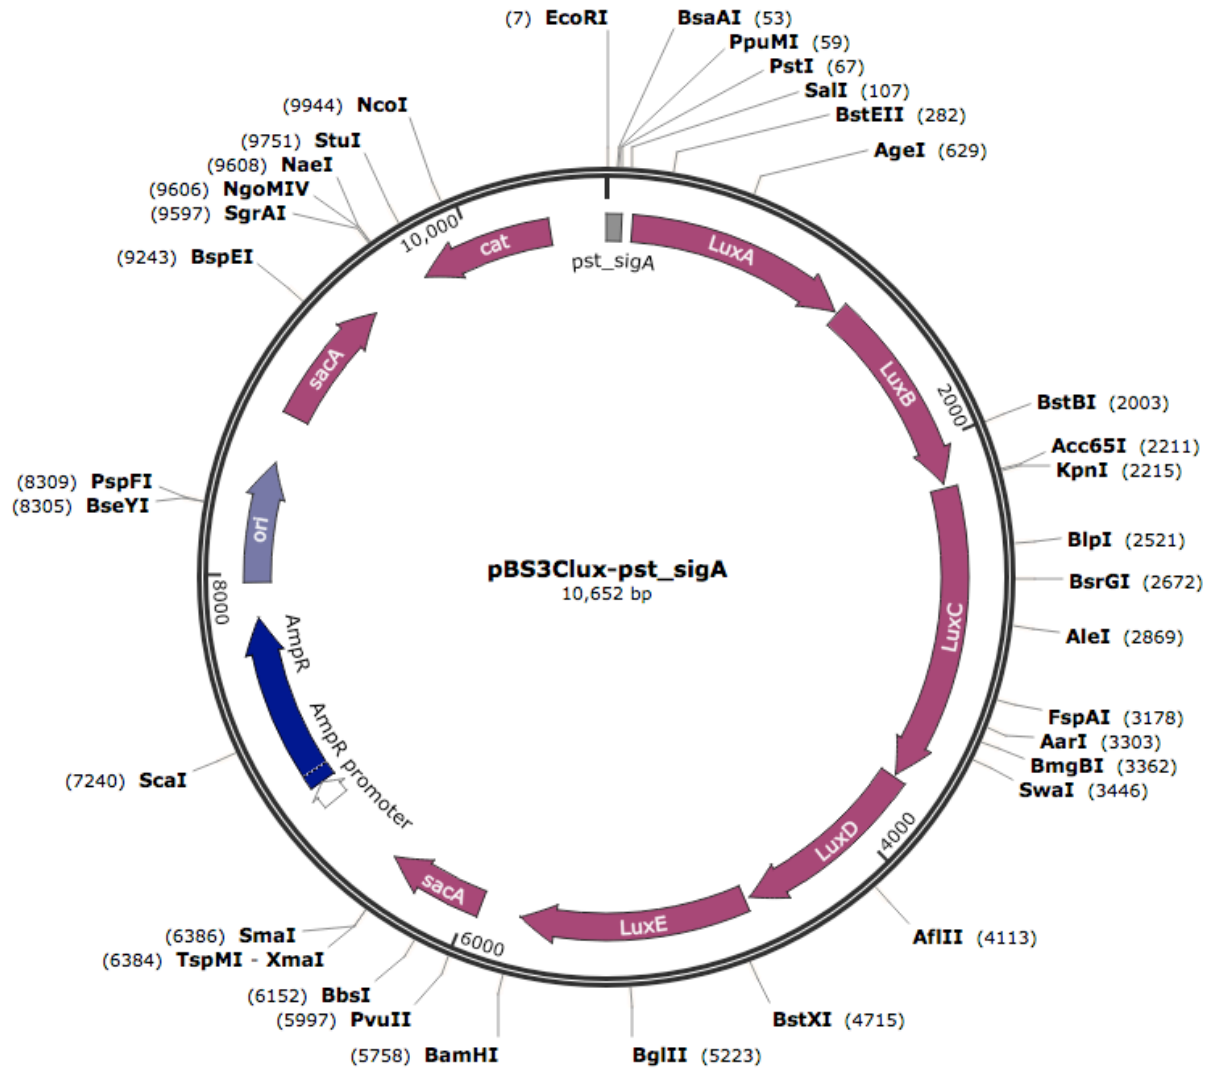

**Figure S16.** Plasmid map: pBS3Clux-pst\_sigA. Restriction sites used to insert *pst\_sigA*: EcoRI, PstI.

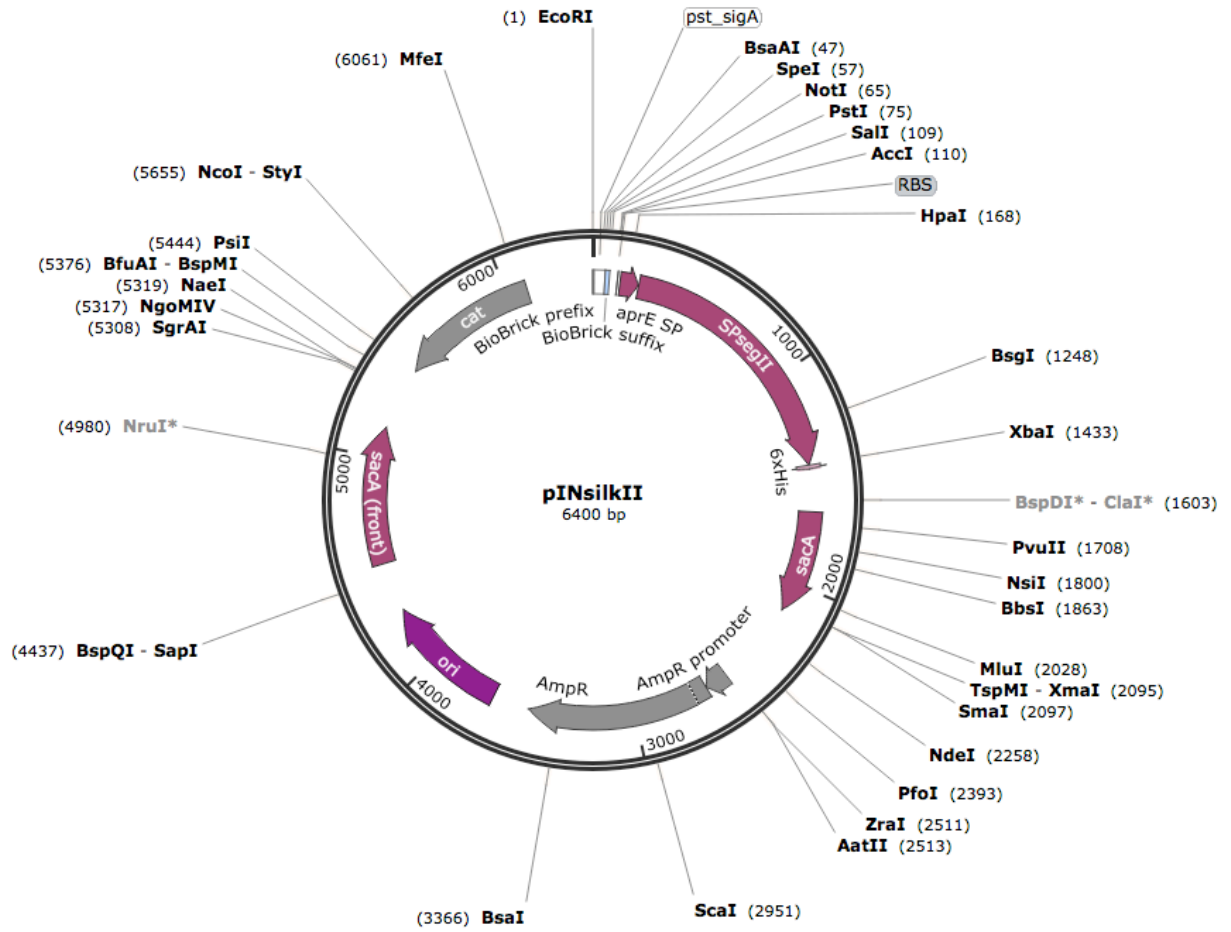

**Figure S17.** Plasmid map: pINSilkII. Restriction sites used: EcoRI, BglII (a new restriction site introduced in synthesis).

## Supplementary note 11: Culture media and protocols

### Preparation of MSgg - Biofilm inducing medium

For 500 ml of medium (x1 or for plates prepare x2, see notes below):

STEP 1 - (everything except  $\text{CaCl}_2$  and  $\text{FeCl}_3$ ):

Add to a 500ml tube the ingredients in the table below:

**Table S9A. culture medium ingredients**

| Component                                          | Volume to add (ml) for x1 | Volume to add (ml) for x2 | Final conc. In x1 medium | Sterilization by | Store        | Quantity of powder for 100ml stock solution (g) |
|----------------------------------------------------|---------------------------|---------------------------|--------------------------|------------------|--------------|-------------------------------------------------|
| 1M $\text{K}_2\text{HPO}_4$                        | 1.5375                    | 3.075                     | 5mM                      | Autoclave        | RT           | 17.418                                          |
| 1M $\text{KH}_2\text{PO}_4$                        | 0.9625                    | 1.925                     | 5mM                      | Autoclave        | RT           | 13.609                                          |
| 0.5M MOPS<br>pH 7*                                 | 100                       | 200                       | 100mM                    | Filter           | 4°C, in dark | See a detailed description below                |
| 1M $\text{MgCl}_2$<br>(*6 $\text{H}_2\text{O}$ )   | 1                         | 2                         | 2mM                      | Autoclave        | RT           | 20.330                                          |
| 10mM $\text{MnCl}_2$<br>(*4 $\text{H}_2\text{O}$ ) | 2.5                       | 5                         | 50 $\mu\text{M}$         | Autoclave        | RT, in dark  | 0.19791                                         |
| 1mM $\text{ZnCl}_2$                                | 0.5                       | 1                         | 1 $\mu\text{M}$          | Autoclave        | RT           | 0.01363                                         |
| 10mM thiamine hydrochloride                        | 0.1                       | 0.2                       | 2 $\mu\text{M}$          | Filter           | 4°C          | 0.33727                                         |
| 10 mg/ml Phe                                       | 2.5                       | 5                         | 50 $\mu\text{g/ml}$      | Filter           | 4°C          | 1                                               |
| 10 mg/ml Trp                                       | 2.5                       | 5                         | 50 $\mu\text{g/ml}$      | Filter           | 4°C          | 1                                               |
| 10 mg/ml Thr                                       | 2.5                       | 5                         | 50 $\mu\text{g/ml}$      | Filter           | 4°C          | 1                                               |
| 50% glycerol                                       | 5                         | 10                        | 0.5%                     | Autoclave        | RT           | 50ml                                            |
| 10% monosodium glutamate                           | 25                        | 50                        | 0.5%                     | Autoclave        | RT           | 10                                              |

\*MOPS (500ml of 0.5M stock solution) prepare as follows: weight 52.33gr and add 300ml dW. Using a pH meter, titer to pH = 7.05 with NaOH 5M solution. Add more dW to reach 500ml. Filter and keep in dark at 4oC.

STEP 2 - (water and filtration):

Add dW to reach ~485ml, then filter.

STEP 3 -  $\text{CaCl}_2$ :

Add CaCl<sub>2</sub> as follows (to ~500ml medium):

**Table S9B. culture medium ingredients (continued)**

| Component              | Volume to add (ml) for x1 | Volume to add (ml) for x2 | Final conc. In x1 medium | Sterilization by | Store | Quantity of powder for 100ml stock solution (g) |
|------------------------|---------------------------|---------------------------|--------------------------|------------------|-------|-------------------------------------------------|
| 0.5M CaCl <sub>2</sub> | 0.7                       | 1.4                       | 700µM                    | Autoclave        | RT    | 5.549                                           |

Look for a faint opaque white cloud in the medium - a sign that everything is good...

STEP 4 - FeCl<sub>3</sub>:

Just before using the medium, add FeCl<sub>3</sub> as follows (to ~500ml medium):

**Table S9C. culture medium ingredients (continued)**

| Component             | Volume to add (ml) for x1 | Volume to add (ml) for x2 | Final conc. In x1 medium | Sterilization by | Store | Quantity of powder for 100ml stock solution (g) |
|-----------------------|---------------------------|---------------------------|--------------------------|------------------|-------|-------------------------------------------------|
| 5mM FeCl <sub>3</sub> | 5                         | 10                        | 50µM                     | Autoclave        | RT    | 0.13515                                         |

If you prepare plates - add more FeCl<sub>3</sub> - about x2.5 of the amount listed above.

STEP 5 - Preparing the plates (1 Liter total):

Add 7.5gr agar to 250ml dH<sub>2</sub>O (agar concentration of 3%) and autoclave.

After autoclave mix well with 250ml MSgg medium x2 at RT, and pour solution to the plates.

It is better to mix and pour in 50ml tube when preparing small quantities of plates - the agar tend to congeal rapidly.

### Modified competence (MC) medium

**Table S10. 10X MC ingredients**

|                                        |              |
|----------------------------------------|--------------|
| K <sub>2</sub> HPO <sub>4</sub>        | 10.712 g     |
| KH <sub>2</sub> PO <sub>4</sub>        | 5.239 g      |
| Glucose                                | 20 g         |
| 1 M Trisodium citrate                  | 3 ml         |
| 22 mg/ml ferric ammonium citrate       | 1 ml         |
| Casein Hydrolase (from Merck!)         | 1 g          |
| Potassium Glutamate / Sodium Glutamate | 2 g / 1.84 g |

- Mix with sDH<sub>2</sub>O for final volume of 100 ml
- Filter
- Aliquot to 1 ml
- Store at -20°C

## Procedure

1. Pick a fresh single colony from an LB plate with a sterile wooden stick to a sterile 15 ml tube containing following:
  - 900  $\mu$ l dH<sub>2</sub>O
  - 100  $\mu$ l 10X MC
  - 10  $\mu$ l 1M MgSO<sub>4</sub>
2. Mix by vortexing
3. Incubate in a roller-drum shaker at 37 °C for 3 - 4 hr.
4. Dispense 300  $\mu$ l of the sample to sterile 15 ml culture tubes.
5. Add 2  $\mu$ l gDNA or 5  $\mu$ l plasmid to the tube
  - è One tube should contain no DNA for negative control
6. Incubate in a roller-drum shaker at 37 °C for another 3 h
7. Plate sample on two different selective marker plates with sterile beads on:
  - a. 250  $\mu$ l
  - b. 50  $\mu$ l
8. Incubate plate at 37 °C overnight (when encountering problems, incubate at 30 °C)
9. Perform differential plating from a single colony with sterile wooden stick to the same selective plate as in step 7 and incubate plate at 37 °C overnight
10. If required perform differential plating from a single colony on another selective marker plate and incubate plate at 37 °C overnight
11. Pick a single colony with a wooden sterile stick into 1 ml liquid LB
12. Incubate at 23 °C overnight or at 37 °C for 2 h in a roller-drum shaker
13. Add 900  $\mu$ l sample to 600  $\mu$ l 50% glycerol in a freezing tube
14. Vortex well
15. Freeze the strain at -80 °C
16. Add your strain's genotype and phenotype to the IK strain collection
